# Supplementary material for: Combining structured and unstructured data in EMRs to create clinically-defined EMR-derived cohorts
Source: PubMed Central journal article supplement (PMC7938556; doi:10.1186/s12911-021-01441-w), 2021-03-08

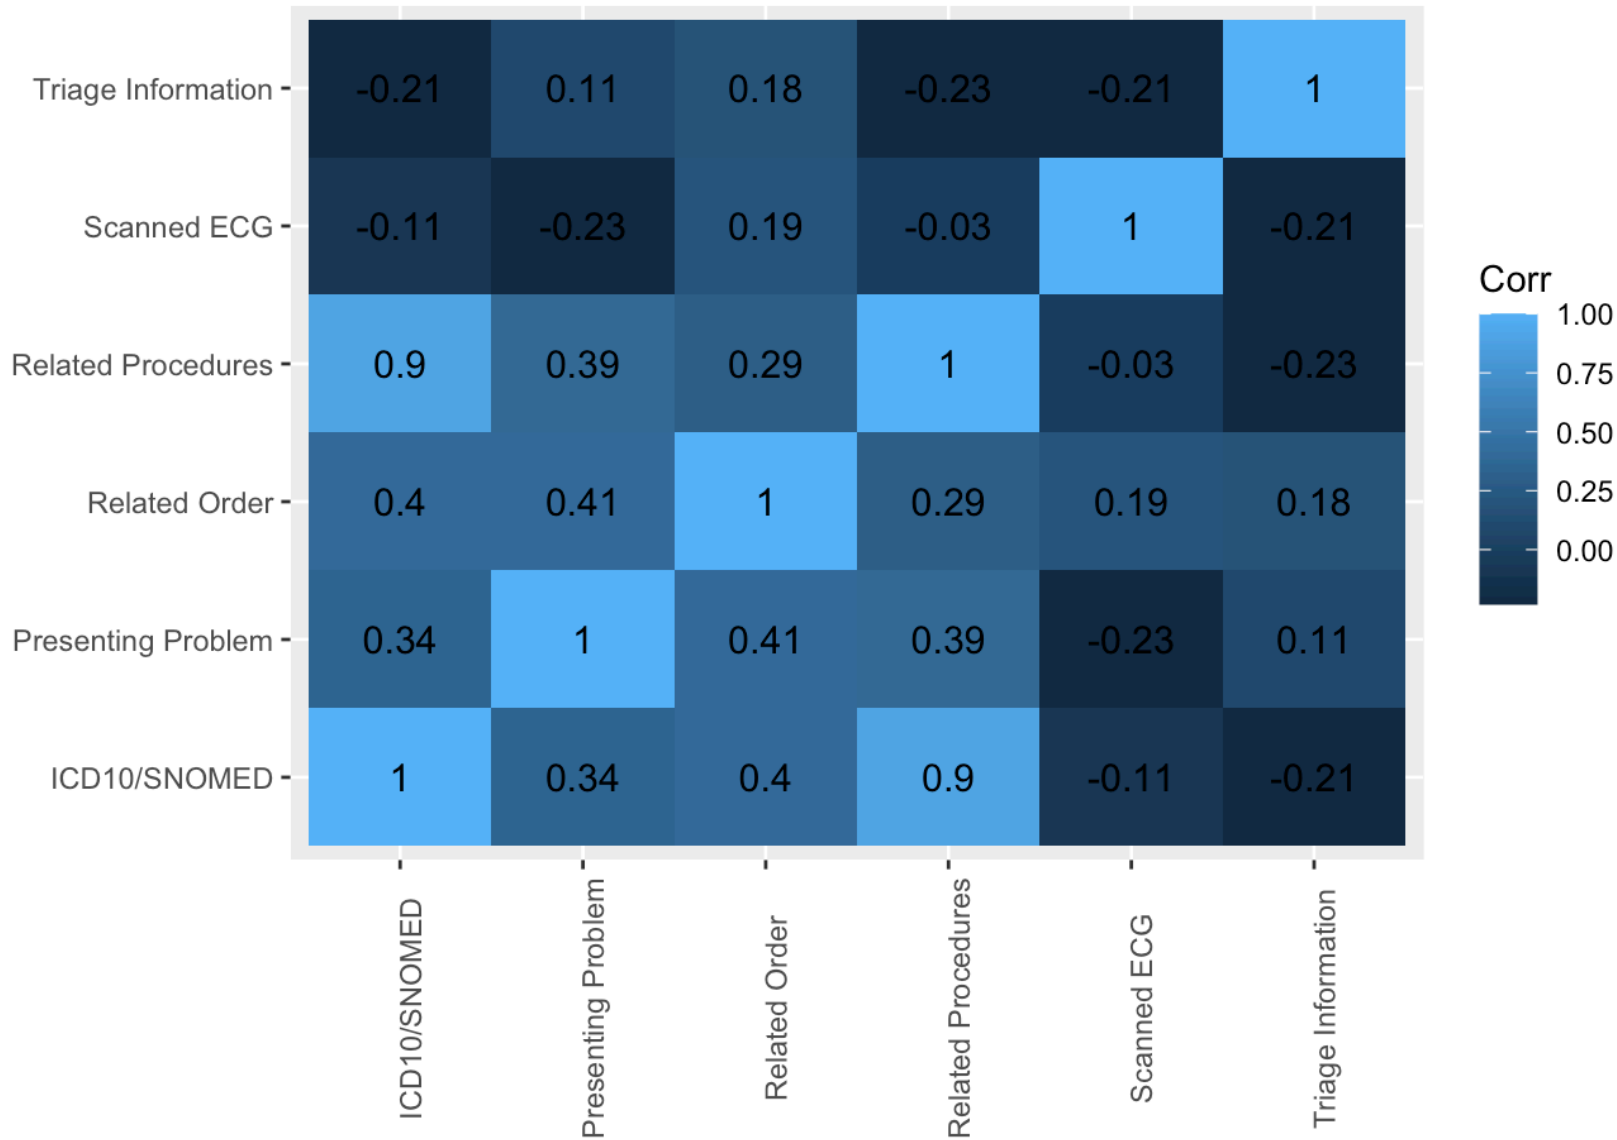

Supplement: 12911_2021_1441_MOESM3_ESM.pdf [file 12911_2021_1441_MOESM3_ESM.pdf]
